# Supplementary material for: Synergistic effects of H 2 O 2 on the performance of nano-zero-valent manganese biochar (nZVMn/PBC) for the treatment of chlorpyrifos from aqueous solution
Source: Royal Society of Chemistry journal article supplement (doi:10.1039/d5ra06773a), 2025-01-01
Supplement: d5ra06773a1.pdf [file d5ra06773a1.pdf]

## SUPPLEMENTARY DATA

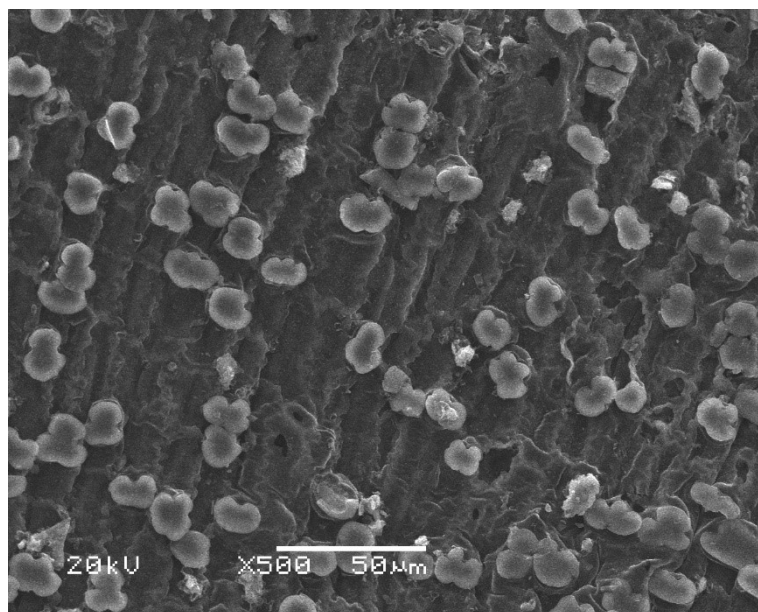

**S1.** SEM images of Biochar

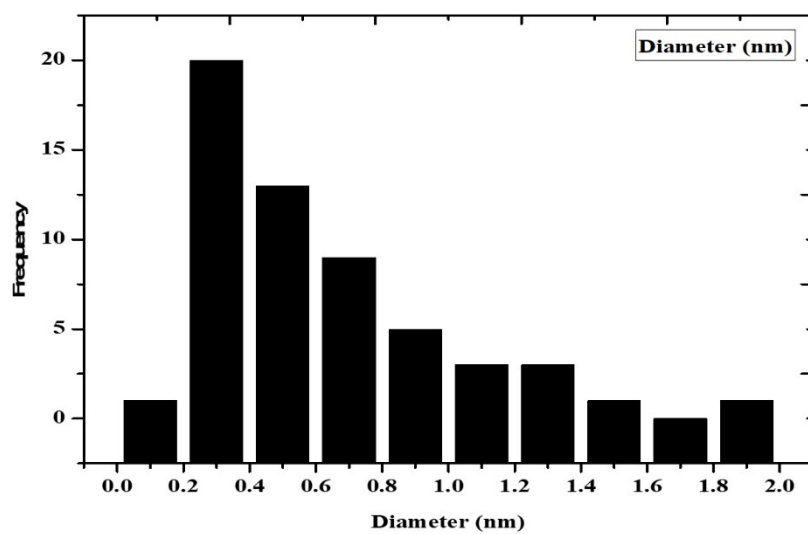

**S2.** Average particle size histogram



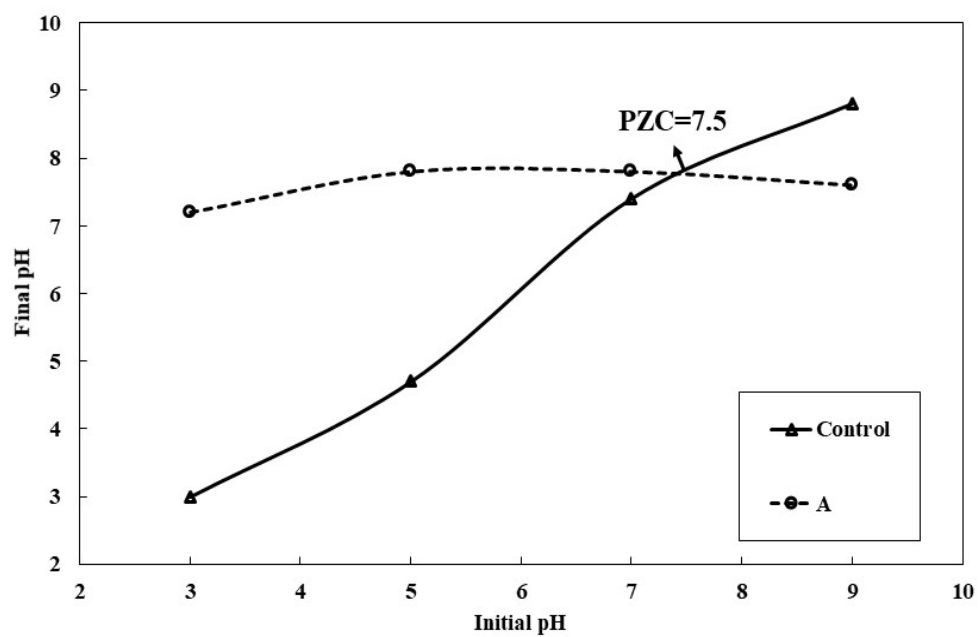

### S5. Point of zero charge of nZVMn/PBC

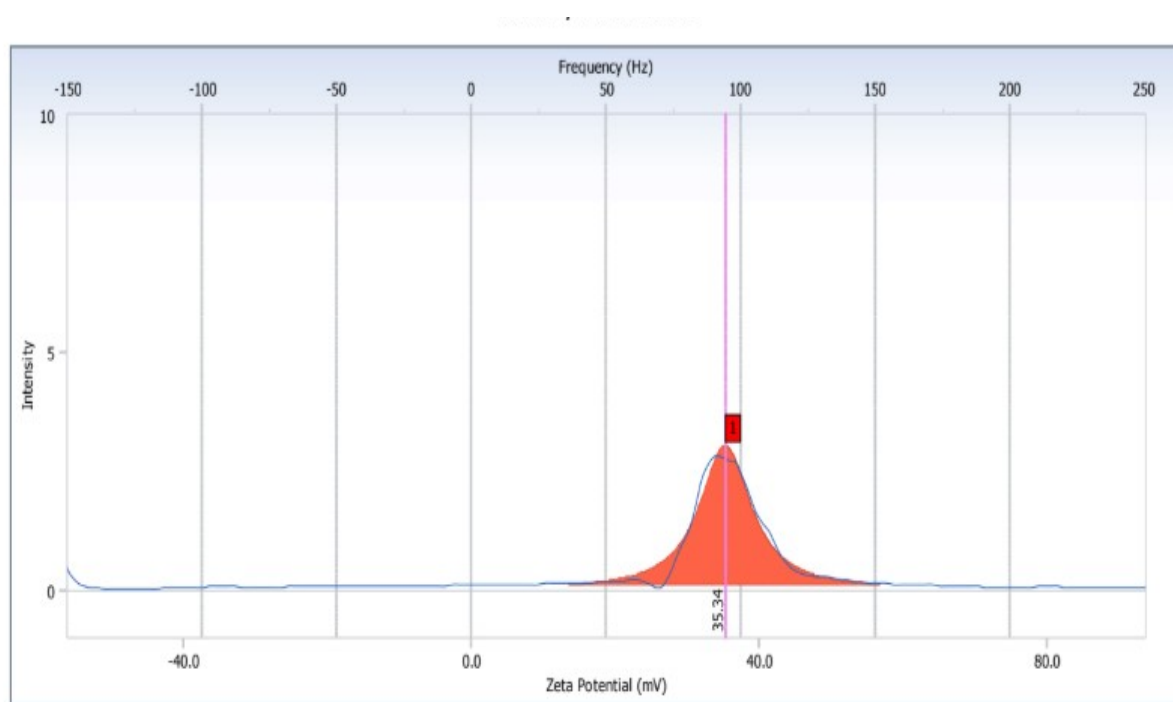

Measurement Results

### S6. Zeta Potential of nZVMn/PBC

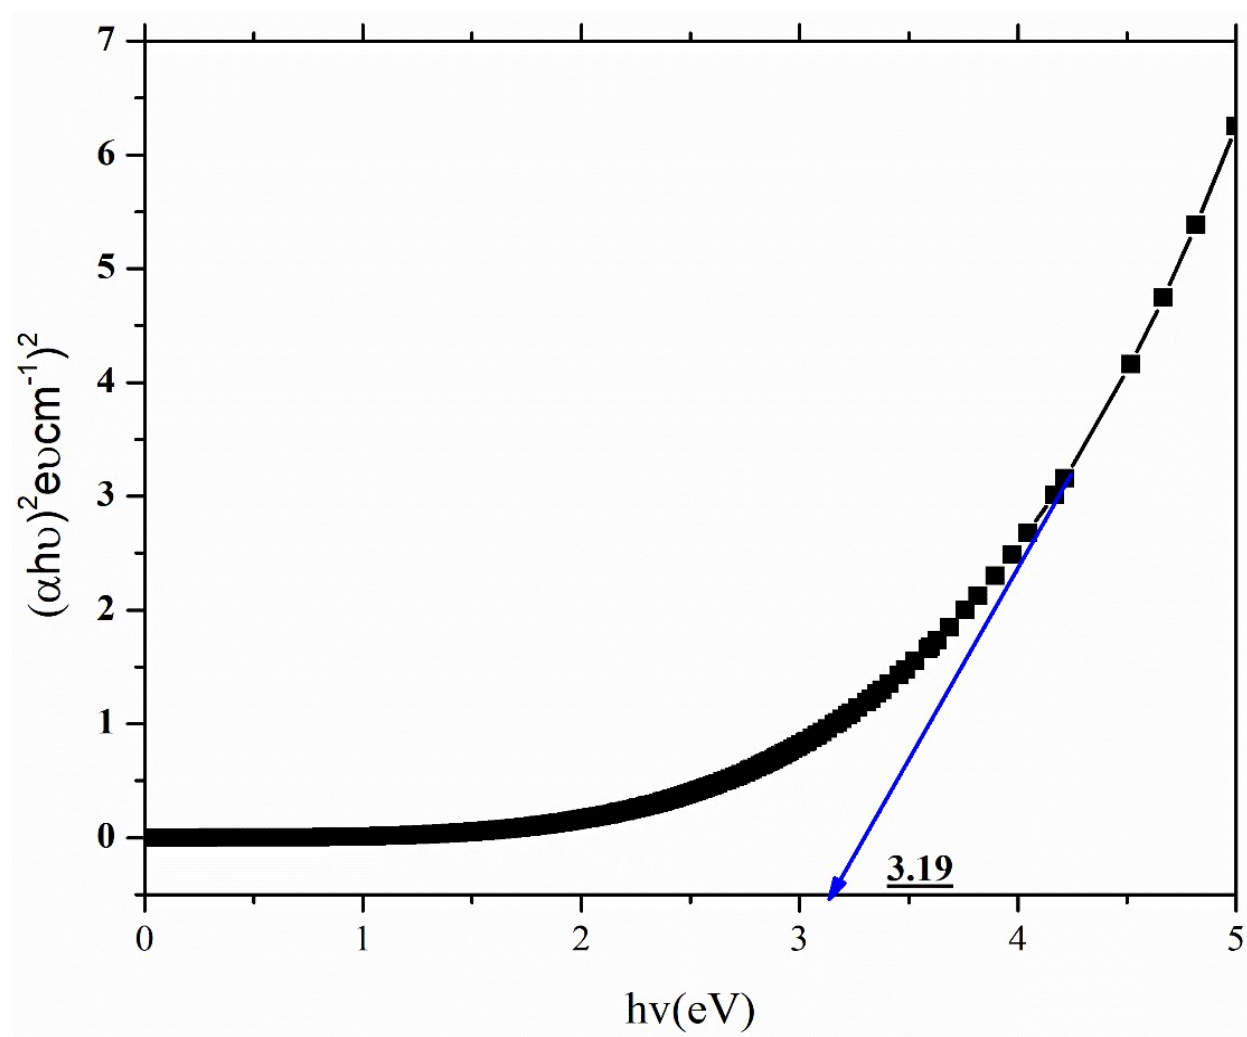

**S7:** UV-Vis band gap of *n*ZVMn@PBC

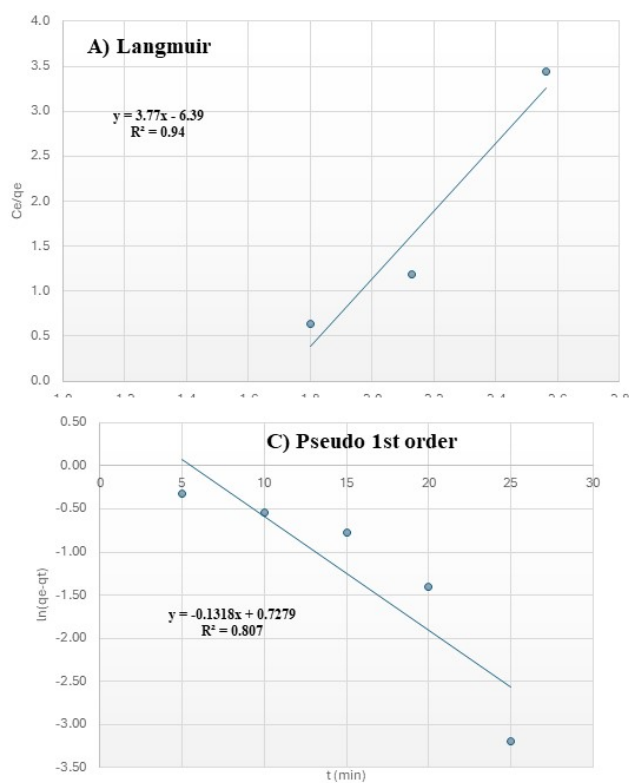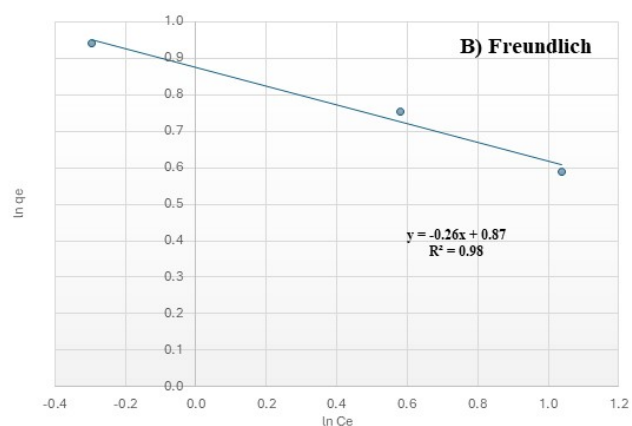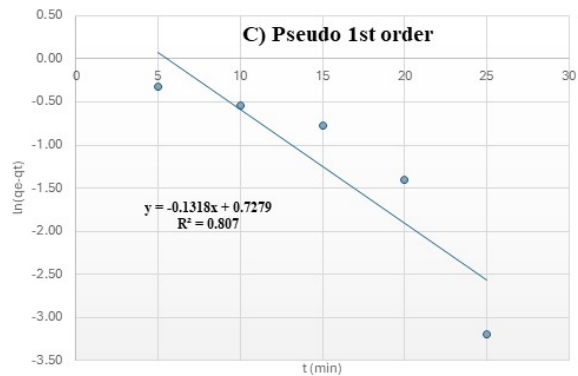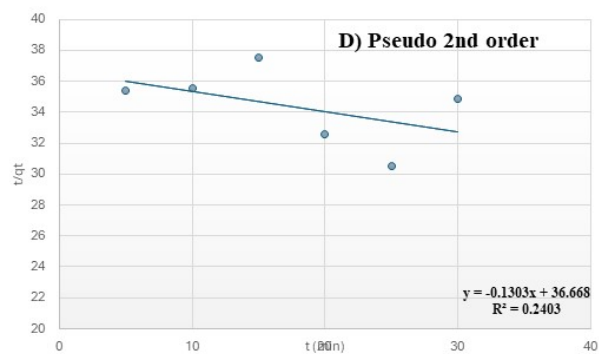

**S8.** Adsorption and kinetic modeling A) Langmuir B) Freundlich C) pseudo-first- order D) pseudo-second-Order) for pesticide adsorption by nZVMn/PBCcomposite

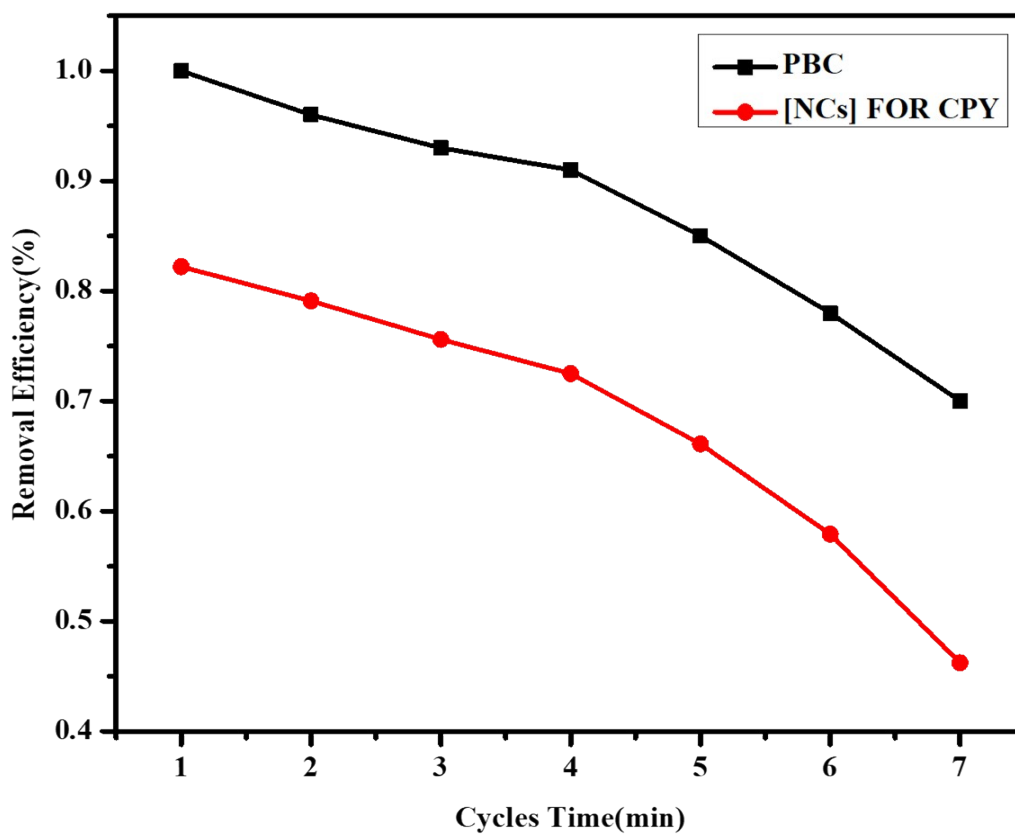

**S9.** Reusability evaluation of the synthesized PBC and nZVMn/PBC for CPF removal. [Experimental conditions, UV light,  $[nZVMn/PBC]_0 = 1000$  mg/L,  $[CPF]_0 = 100$  mg/L,  $[H_2O_2]_0 = 10$  mg/L, Temp = 25°C, Contact time 20-120 min, pH = 8.0

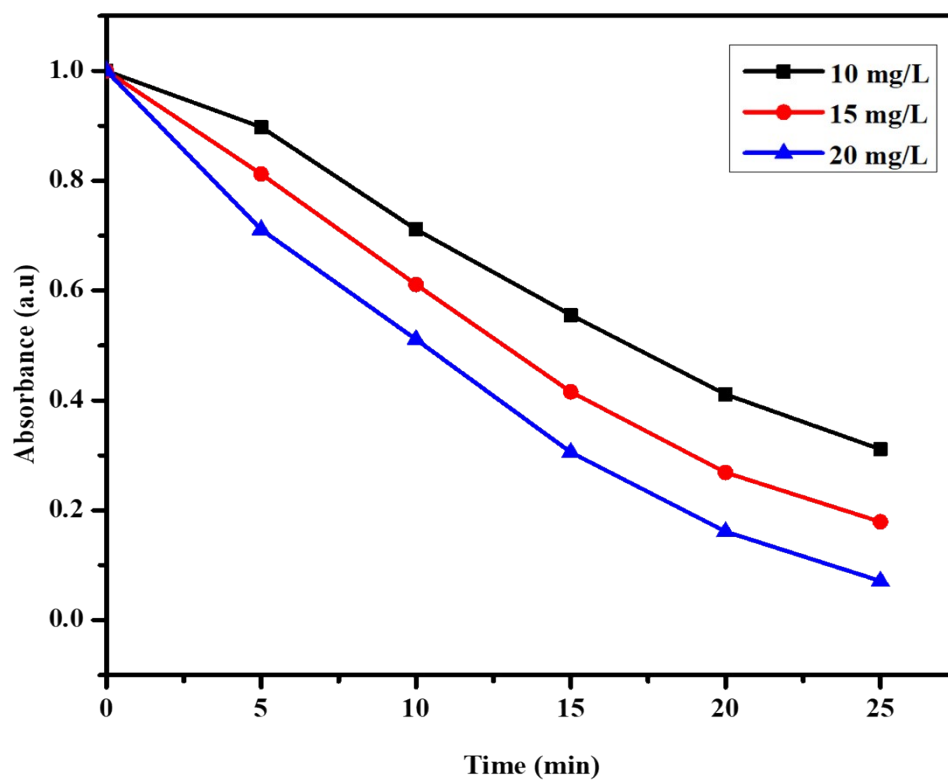

**S10.** Effect of  $[\text{H}_2\text{O}_2]_0$  concentration on degradation of CPF. [Experimental conditions, UV light,  $[\text{nZVMN/PBC}]_0 = 1000 \text{ mg/L}$ ,  $[\text{CPF}]_0 = 100 \text{ mg/L}$ ,  $[\text{H}_2\text{O}_2]_0 = 10, 15, \text{ and } 20 \text{ mg/L}$ ,  $\text{pH} = 8.0$ ]
